# Supplementary material for: Association between vision impairment and mortality: protocol for a systematic review and meta-analysis
Source: PubMed Central journal article supplement (PMC7311038; doi:10.1136/bmjopen-2020-037556), 2020-06-21
Supplement: bmjopen-2020-037556supp001.pdf [file bmjopen-2020-037556supp001.pdf]

## Appendix 1. PRISMA-P 2015 Checklist

| Section/topic                     | #  | Checklist item                                                                                                                                                                                                            | Information reported                |                                     | Line number(s)    |
|-----------------------------------|----|---------------------------------------------------------------------------------------------------------------------------------------------------------------------------------------------------------------------------|-------------------------------------|-------------------------------------|-------------------|
|                                   |    |                                                                                                                                                                                                                           | Yes                                 | No                                  |                   |
| <b>ADMINISTRATIVE INFORMATION</b> |    |                                                                                                                                                                                                                           |                                     |                                     |                   |
| <b>Title</b>                      |    |                                                                                                                                                                                                                           |                                     |                                     |                   |
| Identification                    | 1a | Identify the report as a protocol of a systematic review                                                                                                                                                                  | <input checked="" type="checkbox"/> | <input type="checkbox"/>            | 1, 27, 47, 65, 99 |
| Update                            | 1b | If the protocol is for an update of a previous systematic review, identify as such                                                                                                                                        | <input checked="" type="checkbox"/> | <input type="checkbox"/>            | 94                |
| <b>Registration</b>               | 2  | If registered, provide the name of the registry (e.g., PROSPERO) and registration number in the Abstract                                                                                                                  | <input checked="" type="checkbox"/> | <input type="checkbox"/>            | 36, 112           |
| <b>Authors</b>                    |    |                                                                                                                                                                                                                           |                                     |                                     |                   |
| Contact                           | 3a | Provide name, institutional affiliation, and e-mail address of all protocol authors; provide physical mailing address of corresponding author                                                                             | <input checked="" type="checkbox"/> | <input type="checkbox"/>            | 5-14              |
| Contributions                     | 3b | Describe contributions of protocol authors and identify the guarantor of the review                                                                                                                                       | <input checked="" type="checkbox"/> | <input type="checkbox"/>            | 324-328           |
| <b>Amendments</b>                 | 4  | If the protocol represents an amendment of a previously completed or published protocol, identify as such and list changes; otherwise, state plan for documenting important protocol amendments                           | <input type="checkbox"/>            | <input checked="" type="checkbox"/> | N/A               |
| <b>Support</b>                    |    |                                                                                                                                                                                                                           |                                     |                                     |                   |
| Sources                           | 5a | Indicate sources of financial or other support for the review                                                                                                                                                             | <input checked="" type="checkbox"/> | <input type="checkbox"/>            | 330-337           |
| Sponsor                           | 5b | Provide name for the review funder and/or sponsor                                                                                                                                                                         | <input checked="" type="checkbox"/> | <input type="checkbox"/>            | 330-337           |
| Role of sponsor/funder            | 5c | Describe roles of funder(s), sponsor(s), and/or institution(s), if any, in developing the protocol                                                                                                                        | <input checked="" type="checkbox"/> | <input type="checkbox"/>            | 336-337           |
| <b>INTRODUCTION</b>               |    |                                                                                                                                                                                                                           |                                     |                                     |                   |
| <b>Rationale</b>                  | 6  | Describe the rationale for the review in the context of what is already known                                                                                                                                             | <input checked="" type="checkbox"/> | <input type="checkbox"/>            | 94-97             |
| <b>Objectives</b>                 | 7  | Provide an explicit statement of the question(s) the review will address with reference to participants, interventions, comparators, and outcomes (PICO)                                                                  | <input checked="" type="checkbox"/> | <input type="checkbox"/>            | 103-107           |
| <b>METHODS</b>                    |    |                                                                                                                                                                                                                           |                                     |                                     |                   |
| <b>Eligibility criteria</b>       | 8  | Specify the study characteristics (e.g., PICO, study design, setting, time frame) and report characteristics (e.g., years considered, language, publication status) to be used as criteria for eligibility for the review | <input checked="" type="checkbox"/> | <input type="checkbox"/>            | 132-149           |
| <b>Information sources</b>        | 9  | Describe all intended information sources (e.g., electronic databases, contact with study authors, trial registers, or other grey literature sources) with planned dates of coverage                                      | <input checked="" type="checkbox"/> | <input type="checkbox"/>            | 121-130           |
| <b>Search strategy</b>            | 10 | Present draft of search strategy to be used for at least one electronic database, including planned limits, such that it could be repeated                                                                                | <input checked="" type="checkbox"/> | <input type="checkbox"/>            | Appendix 2        |

| Section/topic                             | #   | Checklist item                                                                                                                                                                                                                              | Information reported                |                                     | Line number(s)            |
|-------------------------------------------|-----|---------------------------------------------------------------------------------------------------------------------------------------------------------------------------------------------------------------------------------------------|-------------------------------------|-------------------------------------|---------------------------|
|                                           |     |                                                                                                                                                                                                                                             | Yes                                 | No                                  |                           |
| <b>STUDY RECORDS</b>                      |     |                                                                                                                                                                                                                                             |                                     |                                     |                           |
| Data management                           | 11a | Describe the mechanism(s) that will be used to manage records and data throughout the review                                                                                                                                                | <input checked="" type="checkbox"/> | <input type="checkbox"/>            | 200-208                   |
| Selection process                         | 11b | State the process that will be used for selecting studies (e.g., two independent reviewers) through each phase of the review (i.e., screening, eligibility, and inclusion in meta-analysis)                                                 | <input checked="" type="checkbox"/> | <input type="checkbox"/>            | 191-198                   |
| Data collection process                   | 11c | Describe planned method of extracting data from reports (e.g., piloting forms, done independently, in duplicate), any processes for obtaining and confirming data from investigators                                                        | <input checked="" type="checkbox"/> | <input type="checkbox"/>            | 200-208                   |
| <b>Data items</b>                         | 12  | List and define all variables for which data will be sought (e.g., PICO items, funding sources), any pre-planned data assumptions and simplifications                                                                                       | <input checked="" type="checkbox"/> | <input type="checkbox"/>            | 205-207                   |
| <b>Outcomes and prioritization</b>        | 13  | List and define all outcomes for which data will be sought, including prioritization of main and additional outcomes, with rationale                                                                                                        | <input checked="" type="checkbox"/> | <input type="checkbox"/>            | 163-169                   |
| <b>Risk of bias in individual studies</b> | 14  | Describe anticipated methods for assessing risk of bias of individual studies, including whether this will be done at the outcome or study level, or both; state how this information will be used in data synthesis                        | <input checked="" type="checkbox"/> | <input type="checkbox"/>            | 210-218                   |
| <b>DATA</b>                               |     |                                                                                                                                                                                                                                             |                                     |                                     |                           |
| <b>Synthesis</b>                          | 15a | Describe criteria under which study data will be quantitatively synthesized                                                                                                                                                                 | <input checked="" type="checkbox"/> | <input type="checkbox"/>            | 245-256                   |
|                                           | 15b | If data are appropriate for quantitative synthesis, describe planned summary measures, methods of handling data, and methods of combining data from studies, including any planned exploration of consistency (e.g., $I^2$ , Kendall's tau) | <input checked="" type="checkbox"/> | <input type="checkbox"/>            | 220-226, 236-242, 245-256 |
|                                           | 15c | Describe any proposed additional analyses (e.g., sensitivity or subgroup analyses, meta-regression)                                                                                                                                         | <input checked="" type="checkbox"/> | <input type="checkbox"/>            | 258-266                   |
|                                           | 15d | If quantitative synthesis is not appropriate, describe the type of summary planned                                                                                                                                                          | <input type="checkbox"/>            | <input checked="" type="checkbox"/> | N/A                       |
| <b>Meta-bias(es)</b>                      | 16  | Specify any planned assessment of meta-bias(es) (e.g., publication bias across studies, selective reporting within studies)                                                                                                                 | <input checked="" type="checkbox"/> | <input type="checkbox"/>            | 241-242                   |
| <b>Confidence in cumulative evidence</b>  | 17  | Describe how the strength of the body of evidence will be assessed (e.g., GRADE)                                                                                                                                                            | <input checked="" type="checkbox"/> | <input type="checkbox"/>            | 245-246                   |

**Appendix 2: MEDLINE Ovid search strategy**

1. exp eye diseases/
2. Visually Impaired Persons/
3. ((low\$ or handicap\$ or subnormal\$ or impair\$ or partial\$ or disab\$ or disorder\$ or loss\$ or limit\$) adj3 (vision or visual\$ or sight\$)).tw.
4. ((macul\$ or retina\$ or choroid\$) adj3 degener\$).tw.
5. ((macul\$ or retina\$ or choroid\$) adj3 neovasc\$).tw.
6. (AMD or ARMD).tw.
7. ((diabet\$ or proliferative or non-proliferative or pre-proliferative) adj4 retinopath\$).tw.
8. (diabet\$ adj2 (eye\$ or vision or visual\$ or sight\$)).tw.
9. glaucoma\$.tw.
10. cataract\$.tw.
11. blindness.tw.
12. Visual Acuity/
13. visual acuit\$.tw.
14. Contrast Sensitivity/
15. (contrast adj2 sensitivity).tw.
16. Depth Perception/
17. stereopsis.tw.
18. (stereo adj1 acuit\$).tw.
19. Visual Fields/
20. ((visual\$ or vision) adj2 function\$).tw.
21. or/1-20
22. exp Mortality/
23. Death Certificates/
24. mortality.tw.
25. death\$.tw.
26. (fatality or fatalities).tw.
27. or/22-26
28. Cohort Studies/
29. Longitudinal Studies/
30. (cohort\$ or longitudinal).tw.
31. Cross-Sectional Studies/
32. "Surveys and Questionnaires"/
33. Health Surveys/
34. (survey or surveys).tw.
35. or/28-34
36. 21 and 27 and 35
37. (neonate\$ or preterm\$ or prematurity or infant\$ or child\$).tw.
38. visual analog\$ scale.tw.
39. (case adj2 report\$).tw.
40. (animal or mouse or mice or rat or rats).ti.
41. or/37-40
42. 36 not 41
